# Supplementary material for: Morphology-dependent, green, and selective catalytic styrene oxidation on Co3O4
Source: Royal Society of Chemistry journal article supplement (doi:10.1039/c8dt05154b), 2019-01-01
Supplement: c8dt05154b1.pdf [file c8dt05154b1.pdf]

## Morphology Dependent, Green, and Selective Catalytic Styrene Oxidation on $\text{Co}_3\text{O}_4$

Ruchi Jain<sup>a</sup> and Chinnakonda S. Gopinath<sup>ab</sup>

### Electronic Supplementary Information (ESI)

#### ESI 1. Calculation of turn-over frequency

Turn-over frequency (TOF) was calculated by using the measured conversion of 50 mg  $\text{Co}_3\text{O}_4$  catalyst.

(a) Total no. of  $\text{Co}^{3+}$  site in 0.05gm of NR catalysts

Calculation of the total surface area of 0.05 g of  $\text{Co}_3\text{O}_4$  NR

Volume of single NR(based on TEM)= $6 \times 6 \times 60 = 2160 \text{ nm}^3$

Density of  $\text{Co}_3\text{O}_4 = 6.11 \text{ gm.cm}^{-3}$

Volume of 0.05 gm of  $\text{Co}_3\text{O}_4 = 0.05 \text{ gm} / 6.11 \text{ gm.cm}^{-3} = 8.18 \times 10^{-3} \text{ cm}^3 = 8.18 \times 10^{18} \text{ nm}^3$

Total number of nanorods in 0.05 g of  $\text{Co}_3\text{O}_4$  NRs =  $V_{\text{total}} / V_{\text{each nanorod}} = 8.18 \times 10^{18} / 2160$   
 $= 3.78 \times 10^{15}$

Total number of  $\text{Co}^{3+}$  ions on the surfaces of all  $\text{Co}_3\text{O}_4$  nanorods: according to XPS analysis results  $\text{Co}_3\text{O}_4$  NR contains almost 58% of  $\text{Co}^{3+}$  site at UHV RT. Hence.

Total no. of active site i.e.  $\text{Co}^{3+}$  sites in NR =  $3.78 \times 10^{15} \times 58/100 = 2.19 \times 10^{15}$

(b) Total no. of  $\text{Co}^{3+}$  site in 0.05gm of NC catalysts

Calculation of the total surface area of 0.05 g of  $\text{Co}_3\text{O}_4$  NC

Volume of single NC(based on TEM)= $20 \times 20 \times 20 = 8000 \text{ nm}^3$

Density of  $\text{Co}_3\text{O}_4 = 6.11 \text{ gm.cm}^{-3}$

Volume of 0.05 gm of  $\text{Co}_3\text{O}_4 = 0.05 \text{ gm} / 6.11 \text{ gm.cm}^{-3} = 8.18 \times 10^{-3} \text{ cm}^3 = 8.18 \times 10^{18} \text{ nm}^3$

Total number of nanorods in 0.05 g of  $\text{Co}_3\text{O}_4$  NRs =  $V_{\text{total}} / V_{\text{each nanorod}} = 8.18 \times 10^{18} / 8000$   
 $= 1.02 \times 10^{15}$

Total number of  $\text{Co}^{3+}$  ions on the surfaces of all  $\text{Co}_3\text{O}_4$  nanorods: according to XPS analysis results  $\text{Co}_3\text{O}_4$  NR contains almost 60% of  $\text{Co}^{3+}$  site at UHV RT. Hence.

Total no. of  $\text{Co}^{3+}$  sites in NC catalyst =  $1.02 \times 10^{15} \times 60/100 = 6.12 \times 10^{14}$

(c) Calculation of the total surface area of 0.05 g of  $\text{Co}_3\text{O}_4$  HNR

Total no. of  $\text{Co}^{3+}$  site in 0.05gm of NC catalysts

Calculation of the total surface area of 0.05 g of  $\text{Co}_3\text{O}_4$  NR

Volume of single HNR(based on TEM)= $10 \times 30 \times 120 = 36000 \text{ nm}^3$

Density of  $\text{Co}_3\text{O}_4 = 6.11 \text{ gm.cm}^{-3}$

Volume of 0.05 gm of  $\text{Co}_3\text{O}_4 = 0.05 \text{ gm} / 6.11 \text{ gm.cm}^{-3} = 8.18 \times 10^{-3} \text{ cm}^3 = 8.18 \times 10^{18} \text{ nm}^3$

Total number of nanorods in 0.05 g of  $\text{Co}_3\text{O}_4$  NRs =  $V_{\text{total}} / V_{\text{each nanorod}} = 8.18 \times 10^{18} / 36000$   
 $= 2.27 \times 10^{14}$

Total number of Co<sup>3+</sup> ions on the surfaces of all Co<sub>3</sub>O<sub>4</sub> nanorods: according to XPS analysis results Co<sub>3</sub>O<sub>4</sub> NR contains almost 50% of Co<sup>3+</sup> site at UHV RT. Hence.

Total no. of Co<sup>3+</sup> sites in 0.05 g of catalyst =  $2.27 \times 10^{14} \times 50/100 = 1.13 \times 10^{14}$

(d) *No. of styrene molecules in 0.5 mmol of substrate* =  $6.022 \times 10^{23} \times 0.5 \times 10^{-3}$

$$= 3.0 \times 10^{20}$$

**TOF calculation** = *no. of molecules(mole.) of reactant converted per active site of the catalyst/time*

| Styrene (mmol) | Initial reactant taken(mole.) | Conversion (%) | Conversion (mole.)   | No. of active sites   | TON                | TOF (sec <sup>-1</sup> ) | TOF (min <sup>-1</sup> ) | TOF (h <sup>-1</sup> ) |
|----------------|-------------------------------|----------------|----------------------|-----------------------|--------------------|--------------------------|--------------------------|------------------------|
| 0.5            | $0.3 \times 10^{21}$          | 100            | $0.3 \times 10^{21}$ | $1.02 \times 10^{15}$ | $2.9 \times 10^5$  | 16.1                     | 966                      | $5.79 \times 10^4$     |
| 5.0            | $3.1 \times 10^{21}$          | 49.8           | $1.5 \times 10^{21}$ | $1.02 \times 10^{15}$ | $14.7 \times 10^5$ | 81.6                     | 4896                     | $29.3 \times 10^4$     |
| 8.75           | $5.4 \times 10^{21}$          | 23.2           | $1.2 \times 10^{21}$ | $1.02 \times 10^{15}$ | $11.7 \times 10^5$ | 65                       | 3900                     | $23.4 \times 10^4$     |
| 13.1           | $8.1 \times 10^{21}$          | 17             | $1.4 \times 10^{21}$ | $1.02 \times 10^{15}$ | $13.7 \times 10^5$ | 76.1                     | 4566                     | $27.3 \times 10^4$     |
| 17.5           | $10.8 \times 10^{21}$         | 16             | $1.7 \times 10^{21}$ | $1.02 \times 10^{15}$ | $16.6 \times 10^5$ | 92.2                     | 5532                     | $33.2 \times 10^4$     |
| 26.5           | $16.4 \times 10^{21}$         | 7.3            | $1.2 \times 10^{21}$ | $1.02 \times 10^{15}$ | $11.7 \times 10^5$ | 65                       | 3900                     | $23.4 \times 10^4$     |
